# Supplementary material for: Genome Analysis of an Alphabaculovirus Isolated from the Larch Looper, Erannis ankeraria
Source: MDPI journal article supplement (doi:10.3390/v14010034), 2021-12-24
Supplement: s1 [file s1]

Table S3. EranNPV genome annotation.

| ORF no. | Name <sup>a</sup>    | Start | Str. <sup>b</sup> | End   | Length(aa) | Prom. Motif <sup>c</sup> | ORF no. (amino acid identity, %) |              |            |            |           |            |
|---------|----------------------|-------|-------------------|-------|------------|--------------------------|----------------------------------|--------------|------------|------------|-----------|------------|
|         |                      |       |                   |       |            |                          | AcMNPV                           | HearNPV-G4   | CpGV       | CuniNPV    | NeleNPV   | ApciNPV    |
| 1       | <i>polyhedrin</i>    | 1     | +                 | 741   | 246        | E, L                     | 8 (88.6)                         | 1 (90.2)     | 1 (54.8)   |            | 1 (47.3)  | 1 (99.1)   |
| 2       | <i>orf1629</i>       | 785   | -                 | 1710  | 569        | L                        | 9 (14.0)                         | 2 (14.4)     | 2 (5.2)    |            |           | 118 (39.7) |
| 3       | <i>pk-1</i>          | 2502  | +                 | 3359  | 285        | E, L                     | 10 (38.1)                        | 3 (39.3)     | 3 (28.3)   |            |           | 117 (88.7) |
| 4       | <i>hoar</i>          | 3443  | -                 | 5068  | 541        | E                        |                                  | 4 (15.3)     |            |            |           | 116 (46.4) |
| 5       | <i>orf5</i>          | 6047  | +                 | 7411  | 454        | E, L                     |                                  |              |            |            |           |            |
| 6       | <i>orf6</i>          | 8178  | +                 | 8567  | 129        | L                        |                                  |              |            |            |           |            |
| 7       | <i>odv-e56/pif-5</i> | 8646  | +                 | 9752  | 368        | L                        | 148 (55.5)                       | 15 (51.0)    | 18 (44.5)  | 102 (21.2) | 23 (31.0) | 115 (83.9) |
| 8       | <i>ie-1</i>          | 9854  | -                 | 11644 | 596        | E                        | 147 (23.4)                       | 14 (33.6)    | 7 (9.9)    |            |           | 114 (63.4) |
| 9       | <i>ep23/ac146</i>    | 11712 | +                 | 12305 | 197        | L                        | 146 (32.6)                       | 13 (32.0)    | 8 (21.9)   |            |           | 113 (63.4) |
| 10      | <i>chtBD2</i>        | 12312 | -                 | 12590 | 92         | L                        | 145 (34.7)                       | 12 (60.8)    | 9 (31.3)   |            | 64 (22.0) | 112 (91.3) |
| 11      | <i>odv-ec27</i>      | 12607 | -                 | 13437 | 276        | L                        | 144 (43.1)                       | 11 (51.0)    | 97 (21.5)  | 32 (14.8)  | 63 (16.4) | 111 (71.3) |
| 12      | <i>odv-e18</i>       | 13475 | -                 | 13744 | 89         | L                        | 143 (35.9)                       | 10 (61.7)    | 14 (36.2)  | 31 (12.9)  | 62 (18.9) | 110 (96.6) |
| 13      | <i>p49</i>           | 13753 | -                 | 15198 | 481        | L                        | 142 (45.0)                       | 9 (56.5)     | 15 (29.0)  | 30 (10.3)  | 60 (20.6) | 109 (96.2) |
| 14      | <i>ie-0</i>          | 15226 | -                 | 15996 | 256        | E, L                     | 141 (23.9)                       | 8 (31.9)     |            |            |           | 108 (92.5) |
| 15      | <i>me53</i>          | 16394 | +                 | 17455 | 353        | L                        | 139 (16.8)                       | 16-17 (21.5) | 143 (15.9) |            |           | 107 (81.1) |
| 16      | <i>p74/pif-0</i>     | 17534 | +                 | 19489 | 651        | L                        | 138 (56.4)                       | 20 (52.7)    | 60 (37.1)  | 74 (31.4)  | 47 (2.3)  | 106 (86.9) |
|         | <i>hr1</i>           | 19488 | +                 | 19736 |            |                          |                                  |              |            |            |           |            |
|         | <i>hr2</i>           | 19909 | -                 | 20103 |            |                          |                                  |              |            |            |           |            |
| 17      | <i>dbp-1</i>         | 20188 | +                 | 21006 | 272        | None                     | 25 (17.7)                        | 25 (25.1)    | 81 (10.7)  |            |           | 105 (82.3) |
| 18      | <i>lef6</i>          | 21031 | +                 | 21594 | 187        | L                        | 28 (19.3)                        | 24 (28.2)    | 80 (8.9)   |            |           | 104 (58.0) |
| 19      | <i>ac29</i>          | 21632 | -                 | 21862 | 76         | E, L                     | 29 (31.5)                        | 23 (38.1)    | 19 (28.2)  |            |           | 103 (89.4) |
| 20      | <i>p26-1</i>         | 22008 | +                 | 22832 | 274        | L                        | 136 (29.2)                       | 22 (42.7)    |            |            |           | 102 (89.0) |
| 21      | <i>p10</i>           | 22873 | +                 | 23139 | 88         | E, L                     | 137 (21.2)                       | 21 (51.1)    |            |            |           | 101 (89.7) |

| ORF no. | Name <sup>a</sup> | Start | Str. <sup>b</sup> | End   | Length(aa) | Prom. Motif <sup>c</sup> | ORF no. (amino acid identity, %) |            |           |           |           |            |
|---------|-------------------|-------|-------------------|-------|------------|--------------------------|----------------------------------|------------|-----------|-----------|-----------|------------|
|         |                   |       |                   |       |            |                          | AcMNPV                           | HearNPV-G4 | CpGV      | CuniNPV   | NeleNPV   | ApciNPV    |
| 22      | <i>ac34</i>       | 23141 | -                 | 23695 | 184        | L                        | 34 (20.8)                        | 27 (39.9)  |           |           |           | 100 (87.6) |
| 23      | <i>ubiquitin</i>  | 23741 | +                 | 24004 | 87         | L                        | 35 (67.8)                        | 28 (68.1)  | 54 (65.9) |           |           | 99 (71.4)  |
| 24      | <i>orf24</i>      | 23970 | +                 | 24191 | 73         | L                        |                                  |            |           |           |           | 98 (86.3)  |
| 25      | <i>orf25</i>      | 24208 | -                 | 24495 | 95         | None                     |                                  |            |           |           |           | 97 (69.0)  |
| 26      | <i>39k/pp31</i>   | 24557 | -                 | 25357 | 266        | E, L                     | 36 (30.5)                        | 31 (34.1)  | 57 (13.4) |           |           | 96 (87.7)  |
| 27      | <i>lef-11</i>     | 25329 | -                 | 25700 | 234        | L                        | 37 (26.2)                        | 32 (40.1)  | 58 (30.1) |           | 15 (16.8) | 95 (94.3)  |
| 28      | <i>ADPRase</i>    | 25628 | -                 | 26332 | 234        | E, L                     | 38 (46.6)                        | 33 (46.9)  | 69 (36.3) |           |           | 94 (95.7)  |
| 29      | <i>dbp-2</i>      | 26584 | +                 | 27522 | 312        | L                        | 25 (23.5)                        | 25 (29.6)  |           |           |           | 93 (89.2)  |
| 30      | <b>p47</b>        | 27610 | -                 | 28788 | 392        | None                     | 40 (51.6)                        | 35 (43.5)  | 68 (35.9) | 73 (15.0) | 46 (22.3) | 92 (95.1)  |
|         | <i>hr3</i>        | 28858 | +                 | 29721 |            |                          |                                  |            |           |           |           |            |
| 31      | <i>gp16</i>       | 29739 | -                 | 30029 | 96         | L                        | 130 (32.0)                       | 119 (29.7) |           |           |           | 90 (95.8)  |
| 32      | <i>orf32</i>      | 30080 | +                 | 30478 | 132        | E, L                     |                                  |            |           |           |           |            |
| 33      | <i>p24</i>        | 30481 | -                 | 31188 | 235        | L                        | 129 (35.1)                       | 118 (47.0) | 71 (18.9) |           |           | 89 (88.3)  |
| 34      | <i>orf34</i>      | 31281 | -                 | 31637 | 118        | L                        |                                  |            |           |           |           | 88 (82.7)  |
| 35      | <b>lef-2</b>      | 31576 | +                 | 32220 | 214        | L                        | 6 (35.1)                         | 117 (35.7) | 41 (15.6) | 25 (15.4) | 54 (16.5) | 87 (80.0)  |
| 36      | <i>pkip</i>       | 32288 | +                 | 32824 | 178        | E, L                     | 24 (14.5)                        | 130 (27.0) |           |           |           | 86 (85.6)  |
| 37      | <i>orf37</i>      | 32826 | -                 | 33155 | 109        | E                        |                                  |            |           |           |           | 85(84.4)   |
| 38      | <i>arif-1</i>     | 33265 | -                 | 34050 | 261        | L                        | 21 (13.7)                        | 131 (19.4) |           |           |           |            |
| 39      | <b>pif-2</b>      | 34086 | +                 | 35234 | 382        | L                        | 22 (60.0)                        | 132 (66.6) | 48 (49.2) | 38 (44.5) | 52 (44.0) | 84 (77.4)  |
| 40      | <i>orf40</i>      | 35231 | -                 | 35872 | 213        | None                     |                                  |            |           |           |           |            |
| 41      | <i>nrk-1</i>      | 36101 | +                 | 37312 | 403        | None                     | 33 (13.7)                        |            | 16 (14.9) |           |           | 83 (74.6)  |
| 42      | <i>ac106</i>      | 37322 | -                 | 37978 | 218        | L                        | 106 (14.2)                       | 101 (48.4) | 52 (16.8) |           | 32 (17.5) | 82 (93.1)  |
| 43      | <i>parg</i>       | 38046 | -                 | 39548 | 500        | L                        |                                  | 100 (20.8) |           |           |           | 81(62.6)   |
| 44      | <i>orf44</i>      | 39616 | -                 | 40056 | 146        | L                        |                                  |            |           |           |           | 80 (82.8)  |

| ORF no. | Name <sup>a</sup>          | Start | Str. <sup>b</sup> | End   | Length(aa) | Prom. Motif <sup>c</sup> | ORF no. (amino acid identity, %) |            |           |           |           |           |
|---------|----------------------------|-------|-------------------|-------|------------|--------------------------|----------------------------------|------------|-----------|-----------|-----------|-----------|
|         |                            |       |                   |       |            |                          | AcMNPV                           | HearNPV-G4 | CpGV      | CuniNPV   | NeleNPV   | ApciNPV   |
| 45      | <i>pif-3</i>               | 40049 | -                 | 40669 | 206        | L                        | 115 (43.5)                       | 98 (47.8)  | 35 (28.1) | 46 (25.9) | 66 (26.7) | 79 (90.2) |
| 46      | <i>orf46</i>               | 40696 | -                 | 41022 | 108        | E, L                     |                                  |            |           |           |           | 78 (66.9) |
| 47      | <i>sod</i>                 | 41117 | +                 | 41641 | 174        | L                        | 31 (58.0)                        | 106 (59.7) | 59 (43.1) |           |           | 77 (85.7) |
| 48      | <i>orf48</i>               | 41619 | +                 | 42242 | 207        | L                        |                                  |            |           |           |           |           |
| 49      | <i>calyx/pep</i>           | 42268 | -                 | 43191 | 307        | L                        | 131 (14.7)                       | 120 (34.0) | 22 (12.0) |           | 50 (8.1)  | 76 (37.4) |
| 50      | <i>orf50</i>               | 43325 | +                 | 44425 | 366        | L                        |                                  |            |           |           |           | 75 (89.0) |
| 51      | <i>orf51</i>               | 44433 | -                 | 45334 | 169        | L                        |                                  |            |           |           |           |           |
| 52      | <i>endonuclease</i>        | 45023 | -                 | 45334 | 103        | L                        | 79 (30.5)                        |            | 65 (22.3) |           |           | 74 (81.5) |
| 53      | <i>ac108/pif-9</i>         | 45361 | -                 | 45627 | 88         | L                        | 108 (29.5)                       | 95 (37.2)  |           |           |           | 73 (81.5) |
| 54      | <i>odv-ec43</i>            | 45639 | -                 | 46715 | 358        | E, L                     | 109 (46.3)                       | 94 (58.5)  | 55 (28.1) | 69 (12.2) | 67 (19.6) | 72 (95.5) |
| 55      | <i>ac110/pif-7</i>         | 46715 | -                 | 46882 | 55         | E, L                     | 110 (29.8)                       | 93 (50.0)  | 53 (29.0) | 70 (16.6) | 68 (13.0) | 71 (90.9) |
| 56      | <i>vp80</i>                | 46884 | -                 | 49133 | 749        | L                        | 104 (16.8)                       | 92 (12.2)  |           |           |           | 70 (69.6) |
| 57      | <i>p48/45</i>              | 49185 | +                 | 50366 | 393        | L                        | 103 (39.3)                       | 91 (49.3)  | 83 (30.4) | 55 (9.9)  | 31 (14.3) | 69 (94.1) |
| 58      | <i>p12</i>                 | 50359 | +                 | 50727 | 122        | L                        | 102 (23.0)                       | 90 (27.3)  | 84 (11.0) |           |           | 68 (90.9) |
| 59      | <i>p40</i>                 | 50766 | +                 | 51893 | 375        | L                        | 101 (35.4)                       | 89 (41.3)  | 85 (19.5) | 22 (9.5)  | 29 (14.8) | 67 (91.2) |
| 60      | <i>p6.9</i>                | 51950 | +                 | 52210 | 86         | L                        | 100 (37.9)                       | 88 (54.1)  | 86 (20.9) | 23 (18.4) | 28 (22.0) | 66 (93.0) |
| 61      | <i>lef-5</i>               | 52204 | -                 | 53037 | 277        | E                        | 99 (43.8)                        | 87 (45.0)  | 87 (37.6) | 88 (10.2) | 55 (24.3) | 65 (84.8) |
| 62      | <i>38k</i>                 | 53044 | +                 | 53841 | 265        | L                        | 98 (36.8)                        | 86 (48.2)  | 88 (30.9) | 87 (6.9)  | 56 (25.2) | 64 (91.3) |
| 63      | <i>odv-e28/pif-4</i>       | 53834 | -                 | 54301 | 155        | L                        | 96 (52.6)                        | 85 (54.9)  | 89 (29.0) | 90 (18.6) | 57 (22.4) | 63 (83.1) |
| 64      | <i>helicase</i>            | 54309 | +                 | 57938 | 1209       | L                        | 95 (41.4)                        | 84 (47.3)  | 90 (22.2) | 89 (11.5) | 58 (18.6) | 62 (51.4) |
| 65      | <i>odv-e25</i>             | 57980 | -                 | 58690 | 233        | L                        | 94 (40.0)                        | 82 (52.5)  | 91 (39.5) | 15 (11.7) | 18 (14.3) | 61 (76.8) |
| 66      | <i>p18</i>                 | 58692 | -                 | 59165 | 157        | L                        | 93 (45.1)                        | 81 (57.0)  | 92 (27.4) | 13 (8.6)  | 17 (16.3) | 60 (87.8) |
| 67      | <i>p33</i>                 | 59239 | +                 | 59928 | 229        | L                        | 92 (44.0)                        | 80 (52.7)  | 93 (30.9) | 14 (14.7) | 16 (22.4) | 59 (96.0) |
| 68      | <i>ring finger protein</i> | 59975 | +                 | 60391 | 138        | L                        |                                  |            | 24 ()     |           |           | 58 (50.3) |

| ORF no. | Name <sup>a</sup>            | Start | Str. <sup>b</sup> | End   | Length(aa) | Prom. Motif <sup>c</sup> | ORF no. (amino acid identity, %) |            |            |            |           |           |
|---------|------------------------------|-------|-------------------|-------|------------|--------------------------|----------------------------------|------------|------------|------------|-----------|-----------|
|         |                              |       |                   |       |            |                          | AcMNPV                           | HearNPV-G4 | CpGV       | CuniNPV    | NeleNPV   | ApciNPV   |
|         | <i>hr4</i>                   | 60405 | +                 | 60851 |            |                          |                                  |            |            |            |           |           |
| 69      | <b><i>lef-4</i></b>          | 60854 | -                 | 62200 | 462        | None                     | 90 (42.7)                        | 79 (46.8)  | 95 (28.6)  | 96 (16.5)  | 59 (21.3) | 57 (88.8) |
| 70      | <b><i>vp39</i></b>           | 62241 | +                 | 63212 | 323        | L                        | 89 (37.1)                        | 78 (42.2)  | 96 (22.1)  | 24 (11.7)  | 88 (18.1) | 56 (73.2) |
| 71      | <i>c330</i>                  | 63270 | +                 | 64064 | 264        | E                        | 88 (19.6)                        | 77 (20.7)  | 24 (10.3)  |            |           | 55 (67.2) |
| 72      | <b><i>vp91/p95/pif-8</i></b> | 64090 | -                 | 66414 | 774        | E, L                     | 83 (37.0)                        | 76 (40.8)  | 101 (12.0) | 35 (18.9)  | 82 (21.1) | 54 (82.4) |
| 73      | <i>tlp-20</i>                | 66473 | +                 | 67141 | 222        | E                        | 82 (23.1)                        | 75 (39.9)  | 102 (12.0) |            |           | 53 (83.4) |
| 74      | <b><i>ac81</i></b>           | 67089 | +                 | 67691 | 200        | None                     | 81 (44.6)                        | 74 (47.5)  | 103 (39.6) | 106 (12.6) | 45 (28.5) | 52 (68.1) |
| 75      | <b><i>gp41</i></b>           | 67678 | +                 | 68847 | 389        | L                        | 80 (41.5)                        | 73 (44.8)  | 104 (23.8) | 33 (11.2)  | 44 (16.8) | 51 (90.6) |
| 76      | <b><i>ac78</i></b>           | 68887 | +                 | 69219 | 110        | L                        | 78 (35.8)                        | 72 (43.8)  | 105 (15.9) | 34 (9.9)   | 43 (15.4) | 50 (85.4) |
| 77      | <b><i>vlf-1</i></b>          | 69243 | +                 | 70364 | 373        | L                        | 77 (69.2)                        | 71 (66.3)  | 106 (30.6) | 18 (19.5)  | 42 (23.5) | 49 (61.1) |
| 78      | <i>ac76</i>                  | 70476 | +                 | 70736 | 86         | E, L                     | 76 (39.0)                        | 70 (72.0)  | 107 (33.7) |            | 41 (22.9) | 48 (97.6) |
| 79      | <i>ac75</i>                  | 70744 | +                 | 71121 | 125        | L                        | 75 (24.0)                        | 69 (25.0)  | 108 (16.0) |            |           | 47 (87.2) |
| 80      | <b><i>DNA polymerase</i></b> | 71211 | -                 | 74318 | 1035       | E, L                     | 65 (39.4)                        | 67 (52.2)  | 111 (30.3) | 91 (14.9)  | 20 (23.2) | 46 (50.4) |
| 81      | <b><i>desmoplakin</i></b>    | 74320 | +                 | 76779 | 819        | E, L                     | 66 (14.1)                        | 66 (17.0)  | 112 (9.0)  | 92 (4.5)   | 21 (9.9)  | 45 (19.8) |
| 82      | <i>lef-3</i>                 | 76839 | -                 | 78020 | 393        | None                     | 67 (26.9)                        | 65 (29.3)  | 113 (11.8) |            |           | 43 (81.7) |
| 83      | <b><i>pif-6</i></b>          | 78022 | +                 | 78396 | 124        | L                        | 68 (22.3)                        | 64 (51.1)  | 114 (21.7) | 58 (16.6)  | 38 (19.5) | 42 (86.2) |
| 84      | <i>iap-3</i>                 | 78454 | +                 | 79314 | 286        | L                        | 27 (24.5)                        | 103 (28.2) | 17 (41.3)  |            | 11 (14.6) | 41 (13.7) |
| 85      | <i>iap-2</i>                 | 79387 | +                 | 80241 | 284        | L                        | 71 (24.4)                        | 62 (33.3)  | 17 (15.2)  |            | 11 (12.0) | 41 (68.1) |
| 86      | <i>p26-2</i>                 | 80344 | +                 | 81015 | 223        | E                        | 136 (20.0)                       |            |            |            |           | 40 (86.0) |
| 87      | <i>v-cath</i>                | 81061 | -                 | 82047 | 328        | L                        | 127 (63.1)                       | 56 (44.1)  | 11 (40.8)  |            |           | 39 (46.3) |
| 88      | <i>chitinase</i>             | 82108 | +                 | 83793 | 561        | E, L                     | 126 (69.6)                       | 41 (65.2)  | 10 (10.1)  |            |           |           |
| 89      | <i>orf89</i>                 | 83866 | +                 | 84507 | 213        | E, L                     |                                  |            |            |            |           |           |
| 90      | <i>vef</i>                   | 84523 | -                 | 86856 | 777        | L                        |                                  |            |            |            |           |           |
| 91      | <i>gp37</i>                  | 86928 | +                 | 88647 | 275        | L                        | 64 (46.4)                        | 58 (56.7)  | 13 (36.4)  |            |           | 37 (89.4) |

| ORF no. | Name <sup>a</sup>    | Start  | Str. <sup>b</sup> | End    | Length(aa) | Prom. Motif <sup>c</sup> | ORF no. (amino acid identity, %) |            |            |           |           |           |
|---------|----------------------|--------|-------------------|--------|------------|--------------------------|----------------------------------|------------|------------|-----------|-----------|-----------|
|         |                      |        |                   |        |            |                          | AcMNPV                           | HearNPV-G4 | CpGV       | CuniNPV   | NeleNPV   | ApciNPV   |
| 92      | <i>bro-1</i>         | 87946  | +                 | 88647  | 233        | None                     |                                  | 59 (21.7)  |            |           |           |           |
| 93      | <i>bro-2</i>         | 88712  | +                 | 89761  | 349        | L                        | 2 (49.1)                         | 105 (13.7) |            | 108 (8.6) |           | 36 (15.1) |
| 94      | <b><i>lef-9</i></b>  | 90014  | -                 | 91501  | 495        | L                        | 62 (63.8)                        | 55 (69.3)  | 117 (52.9) | 59 (15.9) | 37 (31.8) | 34 (93.9) |
| 95      | <i>fp25k</i>         | 91600  | +                 | 92220  | 206        | L                        | 61 (50.9)                        | 53 (56.6)  | 118 (22.1) |           |           | 33 (95.6) |
| 96      | <i>chaB2</i>         | 92500  | +                 | 92751  | 83         | E, L                     | 60 (38.2)                        | 52 (34.8)  |            |           |           | 32 (83.7) |
| 97      | <i>chaB1</i>         | 92810  | +                 | 93274  | 154        | L                        | 59 (21.4)                        | 51 (26.7)  |            |           |           | 31 (89.8) |
| 98      | <i>ac57</i>          | 93290  | -                 | 93922  | 210        | L                        | 57 (29.3)                        | 50 (33.1)  |            |           |           | 30 (69.5) |
| 99      | <i>ac56</i>          | 94016  | -                 | 94267  | 83         | L                        | 56 (13.8)                        | 49 (31.3)  |            |           |           | 29 (59.4) |
| 100     | <i>ac55</i>          | 94209  | -                 | 94415  | 68         | None                     | 55(30.7)                         | 48 (51.4)  |            |           |           | 28 (80.5) |
| 101     | <b><i>vp1054</i></b> | 94544  | -                 | 95602  | 352        | E, L                     | 54 (38.9)                        | 47 (46.5)  | 138 (24.4) | 8 (16.0)  | 83 (16.8) | 27 (87.8) |
| 102     | <i>lef-10</i>        | 95653  | +                 | 95880  | 75         | L                        | 53a (11.2)                       | 46 (11.6)  | 137 (10.9) |           |           | 26 (17.0) |
| 103     | <i>orf103</i>        | 95883  | +                 | 96956  | 357        | L                        |                                  | 44 (22.2)  |            |           |           | 24 (71.3) |
| 104     | <b><i>ac53</i></b>   | 96945  | -                 | 97364  | 139        | E, L                     | 53 (45.7)                        | 43 (43.8)  | 134 (17.7) | 28 (3.8)  | 77 (11.2) | 23 (87.0) |
| 105     | <i>ac52</i>          | 97402  | +                 | 97956  | 184        | L                        | 52 (13.6)                        | 42 (27.9)  |            |           |           | 22 (75.3) |
| 106     | <i>orf106</i>        | 97953  | -                 | 98120  | 55         | E, L                     |                                  |            |            |           |           |           |
| 107     | <i>iap-2 like</i>    | 98138  | +                 | 98629  | 163        | E, L                     | 71 (18.5)                        | 62 (16.1)  | 94 (17.3)  |           | 11 (5.7)  | 41 (14.1) |
| 108     | <i>djbp</i>          | 98618  | -                 | 99562  | 314        | E, L                     | 51 (11.3)                        | 39 (13.1)  |            |           |           | 21 (54.7) |
| 109     | <b><i>lef-8</i></b>  | 99589  | +                 | 102246 | 885        | None                     | 50 (62.8)                        | 38 (69.4)  | 131 (48.4) | 26 (19.3) | 78 (29.5) | 20 (93.4) |
| 110     | <i>ac43</i>          | 102264 | -                 | 102452 | 62         | L                        | 43 (31.1)                        | 37 (31.2)  |            |           |           |           |
| 111     | <i>lef-12</i>        | 102449 | -                 | 103111 | 220        | None                     | 41 (22.5)                        | 36 (34.6)  |            |           |           |           |
|         | <i>hr5</i>           | 103194 | +                 | 103830 |            |                          |                                  |            |            |           |           |           |
| 112     | <i>ac111</i>         | 103942 | +                 | 104157 | 71         | None                     | 111 (70.4)                       | 116 (32.8) |            |           |           |           |
| 113     | <b><i>pif-1</i></b>  | 104296 | +                 | 105897 | 533        | L                        | 119 (52.3)                       | 111 (45.1) | 75 (32.3)  | 29 (23.4) | 76 (25.9) | 19 (86.3) |
| 114     | <i>ac120</i>         | 105915 | +                 | 106163 | 82         | L                        | 120 (22.7)                       | 112 (28.7) |            |           |           | 18 (70.3) |

| ORF no. | Name <sup>a</sup>               | Start  | Str. <sup>b</sup> | End    | Length(aa) | Prom. Motif <sup>c</sup> | ORF no. (amino acid identity, %) |            |            |           |           |           |
|---------|---------------------------------|--------|-------------------|--------|------------|--------------------------|----------------------------------|------------|------------|-----------|-----------|-----------|
|         |                                 |        |                   |        |            |                          | AcMNPV                           | HearNPV-G4 | CpGV       | CuniNPV   | NeleNPV   | ApciNPV   |
| 115     | <i>fgf</i>                      | 106175 | -                 | 107152 | 325        | E, L                     | 32 (12.5)                        | 113 (17.2) | 123 (8.8)  |           |           | 17 (74.1) |
| 116     | <i>orf116</i>                   | 107196 | +                 | 107354 | 52         | None                     |                                  |            |            |           |           |           |
| 117     | <i>orf117</i>                   | 107372 | +                 | 108157 | 261        | E, L                     |                                  |            |            |           |           | 16 (83.2) |
| 118     | <b><i>alk-exo</i></b>           | 108176 | -                 | 109390 | 404        | None                     | 133 (38.5)                       | 114 (44.5) | 125 (30.5) | 54 (17.3) | 33 (23.2) | 15 (82.7) |
| 119     | <i>ac18</i>                     | 109404 | -                 | 110549 | 381        | None                     | 18 (19.6)                        |            |            |           |           | 14 (80.9) |
| 120     | <i>ac19</i>                     | 110561 | +                 | 110926 | 121        | L                        | 19 (19.8)                        | 115 (26.1) |            |           |           | 13 (90.0) |
| 121     | <i>DNA photolyase</i>           | 111042 | +                 | 112475 | 477        | L                        |                                  |            |            |           |           | 11 (59.0) |
| 122     | <i>chaB3</i>                    | 112508 | -                 | 112780 | 90         | L                        |                                  | 52 (34.4)  |            |           |           |           |
| 123     | <i>odv-e66</i>                  | 112796 | -                 | 114733 | 645        | L                        | 46 (24.5)                        | 96 (41.1)  | 37 (25.7)  |           |           | 10 (82.5) |
| 124     | <i>F</i>                        | 114787 | -                 | 116781 | 664        | E, L                     | 23 (14.8)                        | 133 (5.0)  | 31 (22.2)  |           |           | 9 (94.7)  |
| 125     | <i>peptidase MA superfamily</i> | 116973 | +                 | 119624 | 883        | L                        |                                  | 129 (25.3) |            |           |           | 8 (28.8)  |
| 126     | <i>ac17/bv-ec31</i>             | 119730 | -                 | 120410 | 226        | None                     | 17 (15.3)                        | 128 (24.0) |            |           |           | 7 (76.9)  |
| 127     | <i>orf127</i>                   | 120414 | -                 | 120989 | 191        | None                     |                                  |            |            |           |           | 6 (76.1)  |
| 128     | <i>egt</i>                      | 121199 | -                 | 122764 | 521        | E                        | 15 (45.2)                        | 126 (51.3) | 141 (33.5) |           |           | 5 (90.9)  |
| 129     | <i>orf129</i>                   | 122902 | -                 | 123219 | 105        | L                        |                                  |            |            |           |           | 4 (89.5)  |
| 130     | <b><i>lef-1</i></b>             | 123308 | +                 | 123991 | 227        | L                        | 14 (33.6)                        | 124 (46.9) | 74 (35.5)  | 45 (15.9) | 65 (23.4) | 3 (84.2)  |
| 131     | <i>38.7k</i>                    | 124006 | +                 | 125112 | 368        | L                        | 13 (24.6)                        | 123 (29.7) | 73 (8.3)   |           |           | 2 (88.1)  |

<sup>a</sup> ORFs are listed by their common name or the AcMNPV ortholog and core genes are shown in Bold.

<sup>b</sup> ORF direction is represented by + (clockwise) or – (anticlockwise).

<sup>c</sup> The presence of the following conserved promoter motifs is indicated: E, early promoter motif (TATA box followed by CAKT motif 20-40 bp downstream) within 200 bp of the initiation codon; L, late promoter motif DTAAG within 200 bp of the initiation codon.
