# Supplementary material for: Genome Analysis of an Alphabaculovirus Isolated from the Larch Looper, Erannis ankeraria
Source: MDPI journal article supplement (doi:10.3390/v14010034), 2021-12-24
Supplement: s1 [file s1]

**Table S1.** Basic information of 106 sequenced baculovirus genomes in GenBank.

| Genus                      | Virus <sup>a</sup>                | Abbreviation | Accession no. | Strain/isolate | Length(bp) | ORFs | G + C (%) | Reference |
|----------------------------|-----------------------------------|--------------|---------------|----------------|------------|------|-----------|-----------|
| Alphabaculovirus (Group I) | Autographa californica NPV        | AcMNPV       | NC_001623     | C6             | 133894     | 156  | 40.7      | [1]       |
|                            | Anticarsia gemmatilis NPV         | AgMNPV-2D    | NC_008520     | AgMNPV-2D      | 132239     | 158  | 44.5      | [2]       |
|                            | Anticarsia gemmatilis MNPV        | AgMNPV-37    | KR815466      | AgMNPV-37      | 131855     | 156  | 44.5      | [3]       |
|                            | Antheraea pernyi NPV              | AnpeNPV      | NC_008035     | Liaoning       | 126629     | 147  | 53.5      | [4]       |
|                            | Antheraea pernyi NPV              | AnprNPV      | LC194889      | Liaoning       | 126593     | 150  | 53.3      | -         |
|                            | Antheraea yammamai NPV            | AnyaNPV      | LC375537      | Nagano         | 126270     | 152  | 53.3      | -         |
|                            | Bombyx mori NPV                   | BmNPV        | NC_001962     | T3             | 128413     | 143  | 40.4      | [5]       |
|                            | Bombyx mandarina NPV              | BomaNPV      | FJ882854      | S1             | 126770     | 133  | 40.2      | [6]       |
|                            | Catopsilia Pomona NPV             | CapoNPV      | KU565883      | 416            | 128058     | 131  | 39.7      | [7]       |
|                            | Choristoneura fumiferana DEF MNPV | CfDEFMNPV    | NC_005137     | -              | 131160     | 149  | 45.8      | [8]       |
|                            | Choristoneura fumiferana MNPV     | CfMNPV       | NC_004778     | -              | 129593     | 146  | 50.1      | [9]       |
|                            | Choristoneura murinana NPV        | ChmuNPV      | NC_023177     | Darmstadt      | 124688     | 147  | 50        | [10]      |
|                            | Condylorrhiza vestigialis MNPV    | CoveMNPV     | NC_026430     | -              | 125767     | 138  | 42.9      | [11]      |
|                            | Choristoneura rosaceana NPV       | ChroNPV      | NC_021924     | NB_1           | 129052     | 149  | 48.6      | [12]      |
|                            | Cyclophragma undans NPV           | CyunNPV      | KT957089      | Whiov          | 142900     | 147  | 45        | [13]      |
|                            | Dasychira pudibunda NPV           | DapuNPV      | KP747440      | ML1            | 136761     | 161  | 54.4      | [14]      |
|                            | Epiphyas postvittana NPV          | EppoNPV      | NC_003083     | -              | 118584     | 136  | 40.7      | [15]      |
|                            | Hyphantria cunea NPV              | HycuNPV      | NC_007767     | -              | 132959     | 148  | 45.5      | [16]      |
|                            | Lonomia obliqua MNPV              | LoobNPV      | KP763670      | SP/2000        | 120023     | 134  | 35.7      | -         |
|                            | Maruca vitrata MNPV               | MaviMNPV     | NC_008725     | -              | 111953     | 126  | 38.6      | [17]      |
|                            | Neophasia sp. alphabaculovirus    | NespNPV      | MK293724      | 11             | 129018     | 144  | 44.6      | -         |
|                            | Orgyia pseudotsugata MNPV         | OpMNPV       | NC_001875     | -              | 131995     | 152  | 55        | [18]      |
|                            | Oxyplax ochracea NPV              | OxocNPV      | NC_043529     | 435            | 113971     | 124  | 31.1      | [19]      |

| Genus                                                    | Virus <sup>a</sup>            | Abbreviation     | Accession no. | Strain/isolate | Length(bp) | ORFs | G + C (%) | Reference |
|----------------------------------------------------------|-------------------------------|------------------|---------------|----------------|------------|------|-----------|-----------|
| Alphabaculovirus (group II and other alphabaculoviruses) | Philosamia cynthia ricini NPV | PhcyNPV          | JX404026      | GX-1           | 125376     | 138  | 53.7      | [20]      |
|                                                          | Plutella xylostella MNPV      | PlxyMNPV         | DQ457003      | CL3            | 134417     | 153  | 40.7      | [21]      |
|                                                          | Rachiplusia ou MNPV           | RoMNPV           | AY145471      | R1             | 131526     | 149  | 39.1      | [22]      |
|                                                          | Samia Cynthia NPV             | SacyNPV          | LC375538      | Nagano         | 126094     | 152  | 53.3      | -         |
|                                                          | Samia ricini NPV              | SariNPV          | LC375541      | Guangxi        | 125921     | 149  | 53.5      | -         |
|                                                          | Spilosoma obliqua NPV         | SpobNPV          | KY550224      | IIPR           | 136141     | 135  | 45.4      | -         |
|                                                          | Thysanoplusia orichalcea NPV  | ThorNPV          | NC_019945     | P2             | 132978     | 145  | 39.5      | [23]      |
|                                                          | Adoxophyes honmai NPV         | AdhoNPV          | NC_004690     | ADN001         | 113220     | 125  | 35.6      | [24]      |
|                                                          | Adoxophyes orana NPV          | AdorNPV          | NC_011423     | English        | 111724     | 121  | 35        | [25]      |
|                                                          | Agrotis ipsilon MNPV          | AgipMNPV         | NC_011345     | Illinois       | 155122     | 163  | 48.6      | [26]      |
|                                                          | Agrotis segetum NPV           | AgseNPV-A        | NC_007921     | A              | 147544     | 153  | 45.7      | [27]      |
|                                                          | Agrotis segetum NPV B         | AgseNPV-B        | NC_025960     | B              | 148981     | 150  | 45.7      | [28]      |
|                                                          | Apocheima cinerarium NPV      | ApciNPV          | NC_018504     | -              | 123876     | 118  | 45        | -         |
|                                                          | Artaxa digramma NPV           | ArdiNPV          | MN233792      | 424            | 161734     | 149  | 39.1      | [29]      |
|                                                          | Buzura suppressaria NPV       | BuzuNPV          | NC_023442     | Hubei          | 120420     | 127  | 36.8      | [30]      |
|                                                          | Chrysodeixis chalcites NPV    | ChchNPV          | NC_007151     | -              | 149622     | 151  | 39        | [31]      |
|                                                          | Chrysodeixis includens NPV    | ChinNPV          | KU669289      | IA             | 140808     | 142  | 39.2      | [32]      |
|                                                          | Clanis bilineata NPV          | ClbiNPV          | NC_008293     | DZ1            | 135454     | 129  | 37.7      | [33]      |
|                                                          | Cryptophlebia peltastica NPV  | CrpeNPV          | MH394321      | SA             | 115728     | 126  | 37.2      | [34]      |
|                                                          | Ectropis obliqua NPV          | EcobNPV          | NC_008586     | A1             | 131204     | 126  | 37.6      | [35]      |
|                                                          | Euproctis pseudoconsersa NPV  | EupsNPV          | NC_012639     | Hangzhou       | 141291     | 139  | 40.3      | [36]      |
|                                                          | Helicoverpa armigera MNPV     | HearMNPV         | EU730893      | -              | 154196     | 162  | 40.1      | [37]      |
|                                                          | Helicoverpa armigera NPV NNg1 | HearNPV-<br>NNg1 | AP010907      | NNg1           | 132425     | 143  | 39.1      | [38]      |
|                                                          | Helicoverpa armigera NPV      | HearNPV-C1       | AF303045      | C1             | 130759     | 137  | 38.9      | [39]      |

| Genus | Virus <sup>a</sup>          | Abbreviation | Accession no. | Strain/isolate  | Length(bp) | ORFs | G + C (%) | Reference |
|-------|-----------------------------|--------------|---------------|-----------------|------------|------|-----------|-----------|
|       | Helicoverpa armigera NPV G4 | HearNPV-G4   | NC_002654     | G4              | 131405     | 135  | 39        | [39]      |
|       | Helicoverpa assulta NPV     | HeasNPV      | MG569706      | HasNPV-DJ0031   | 129801     | 128  | 38.8      | -         |
|       | Hemileuca sp. NPV           | HespNPV      | NC_021923     | -               | 140633     | 137  | 38.1      | [40]      |
|       | Hyposidra talaca NPV        | HytaNPV      | MH261376      | HytaNPVIndia001 | 139089     | 141  | 39.6      | [41]      |
|       | Lambdina fiscellaria NPV    | LafiNPV      | NC_026922     | GR15            | 157977     | 137  | 43.7      | [42]      |
|       | Lymantria dispar MNPV       | LdMNPV       | NC_001973     | -               | 161046     | 164  | 57.5      | [43]      |
|       | Leucania separata NPV       | LeseNPV      | NC_008348     | AH1             | 168041     | 169  | 48.6      | [44]      |
|       | Lymantria xyliana MNPV      | LyxyMNPV     | NC_013953     | LyxyMNPV-5      | 156344     | 157  | 53.5      | [45]      |
|       | Mamestra brassicae MNPV     | MbMNPV       | NC_023681     | K1              | 152710     | 159  | 39.9      | [46]      |
|       | Mamestra configurata NPV-A  | MacoNPV-A    | NC_003529     | A               | 155060     | 169  | 41.7      | [47]      |
|       | Mamestra configurata NPV-B  | MacoNPV-B    | NC_004117     | B               | 158482     | 168  | 40        | [48]      |
|       | Malacosoma Neustria NPV     | ManeNPV      | KY968317      | ManeNPV-T2      | 130202     | 131  | 38.2      | [49]      |
|       | Mythimna unipuncta NPV-A    | MyunNPV-A    | NC_043530     | #7              | 148482     | 159  | 48.6      | [50]      |
|       | Mythimna unipuncta NPV-B    | MyunNPV-B    | MH124167      | KY310           | 156647     | 152  | 43.9      | [51]      |
|       | Operophtera brumata NPV     | OpbuNPV      | MF614691      | OpbuNPV-MA      | 119054     | 130  | 39.8      | [52]      |
|       | Orgyia leucostigma NPV      | OrleNPV      | NC_010276     | CFS-77          | 156179     | 135  | 39.9      | [53]      |
|       | Perigonia lusca SNP         | PeluSNPV     | NC_027923     | -               | 132831     | 145  | 40        | [54]      |
|       | Peridroma NPV               | PespNPV      | NC_024625     | GR_167          | 151109     | 139  | 53.2      | [55]      |
|       | Pseudoplusia includens SNP  | PsinSNPV     | NC_026268     | IE              | 139132     | 141  | 39.3      | [56]      |
|       | Spodoptera exigua MNPV      | SeMNPV-QD    | MH370144      | QD              | 128525     | 127  | 37.4      | [57]      |
|       | Spodoptera exigua MNPV      | SeMNPV       | NC_002169     | US1             | 135611     | 139  | 43.8      | [58]      |
|       | Spodoptera frugiperda MNPV  | SfMNPV       | NC_009011     | 3AP2            | 131331     | 143  | 40.2      | [59]      |
|       | Spodoptera eridania NPV     | SperNPV      | MH320559      | 251             | 149090     | 146  | 45        | [60]      |

| Genus                  | Virus <sup>a</sup>            | Abbreviation | Accession no. | Strain/isolate     | Length(bp) | ORFs | G + C (%) | Reference |
|------------------------|-------------------------------|--------------|---------------|--------------------|------------|------|-----------|-----------|
| <i>Betabaculovirus</i> | Spodoptera exempta NPV        | SpexNPV      | MH717816      | 244.1              | 129528     | 139  | 41.2      | -         |
|                        | Spodoptera littoralis NPV     | SpliNPV      | JX454574      | AN1956             | 137998     | 132  | 44.7      | [61]      |
|                        | Spodoptera litura NPV         | SpltNPV      | NC_003102     | G2                 | 139342     | 141  | 42.8      | [62]      |
|                        | Spodoptera litura NPV II      | SpltNPV-II   | NC_011616     | II                 | 148634     | 147  | 45        | -         |
|                        | Sucra jujuba NPV              | SujuNPV      | KJ676450      | 473                | 135952     | 131  | 38.7      | [63]      |
|                        | Trichoplusia ni SNP           | TnSNP        | NC_007383     | -                  | 134394     | 145  | 39        | [64]      |
|                        | Urbanus proteus NPV           | UrprNPV      | NC_029997     | Southern Brazil    | 105555     | 119  | 34.7      | [65]      |
|                        | Adoxophyes orana GV           | AdorGV       | NC_005038     | -                  | 99657      | 119  | 34.5      | [66]      |
|                        | Agrotis segetum GV            | AgseGV       | NC_039213     | DA                 | 131557     | 152  | 37        | [67]      |
|                        | Choristoneura occidentalis GV | ChocGV       | NC_008168     | -                  | 104710     | 116  | 32.7      | [68]      |
|                        | Clostera anachoreta GV        | ClanGV       | NC_015398     | ClanGV-HBH<br>N    | 101487     | 123  | 44.4      | [69]      |
|                        | Clostera anastomosis GV       | ClasGV-A     | NC_022646     | HENAN              | 101818     | 122  | 46.7      | [70]      |
|                        | Clostera anastomosis GV-B     | ClasGV-B     | KR091910      | ClasGV-B           | 107439     | 123  | 37.8      | [71]      |
|                        | Cnaphalocrocis medinalis GV   | CnmeGV       | NC_029304     | Enping             | 111246     | 118  | 35.2      | [72]      |
|                        | Cydia pomonella GV            | CpGV         | NC_002816     | Mexican 1          | 123500     | 143  | 45.3      | [73]      |
|                        | Cryptophlebia leucotreta GV   | CrleGV       | NC_005068     | CV3                | 110907     | 128  | 32.4      | [74]      |
|                        | Diatraea saccharalis GV       | DisaGV       | NC_028491     | Parana-2009        | 98392      | 125  | 35        | [75]      |
|                        | Epinotia aporema GV           | EpapGV       | NC_018875     | -                  | 119082     | 132  | 41.5      | [76]      |
|                        | Erinnyis ello GV              | ErelGV       | NC_025257     | S86                | 102759     | 130  | 38.7      | [77]      |
|                        | Helicoverpa armigera GV       | HearGV       | NC_010240     | -                  | 169794     | 179  | 40.8      | [78]      |
|                        | Hyphantria cunea GV           | HycuGV       | MH923363      | Hc1                | 114825     | 132  | 39.3      | [79]      |
|                        | Mocis latipes GV              | MolaGV       | KR011718      | Southern<br>Brazil | 134272     | 145  | 38.1      | -         |
|                        | Mythimna unipuncta GV         | MyunGV       | NC_033780     | MyunGV#8           | 144673     | 153  | 49.9      | [80]      |

| Genus                | Virus <sup>a</sup>         | Abbreviation | Accession no. | Strain/isolate | Length(bp) | ORFs | G + C (%) | Reference |
|----------------------|----------------------------|--------------|---------------|----------------|------------|------|-----------|-----------|
| Gamma<br>baculovirus | Phthorimaea operculella GV | PhopGV       | NC_004062     | -              | 119217     | 130  | 35.7      | [81]      |
|                      | Plodia interpunctella GV   | PiGV         | NC_032255     | Cambridge      | 112536     | 123  | 44.1      | [82]      |
|                      | Plutella xylostella GV     | PlxyGV       | NC_002593     | K1             | 100999     | 120  | 40.7      | [83]      |
|                      | Pieris rapae GV            | PiraGV       | NC_013797     | Wuhan          | 108592     | 120  | 33.2      | [84]      |
|                      | Pseudaletia unipuncta GV   | PsunGV       | NC_013772     | Hawaiin        | 176677     | 183  | 39.8      | -         |
|                      | Spodoptera frugiperda GV   | SpfrGV       | NC_026511     | VG008          | 140913     | 146  | 46.2      | [85]      |
|                      | Spodoptera litura GV       | SpltGV       | NC_009503     | SIGV-K1        | 124121     | 136  | 38.8      | [86]      |
|                      | Trichoplusia ni GV         | TnGV         | KU752557      | LBIV-12        | 175360     | 172  | 39.7      | [87]      |
|                      | Xestia c-nigrum GV         | XecnGV       | NC_002331     | -              | 178733     | 181  | 40.7      | [88]      |
|                      | Neodiprion abietis NPV     | NeabNPV      | NC_008252     | -              | 84264      | 93   | 33.4      | [89]      |
|                      | Neodiprion lecontei NPV    | NeleNPV      | NC_005906     | -              | 81755      | 89   | 33.3      | [90]      |
|                      | Neodiprion sertifer NPV    | NeseNPV      | NC_005905     | -              | 86462      | 90   | 33.8      | [91]      |
| Delta<br>baculovirus | Culex nigripalpus NPV      | CuniNPV      | NC_003084     | Florida1997    | 108252     | 109  | 50.9      | [92]      |

<sup>a</sup> EranNPV is not shown.

## References

1. Ayres, M. D.; Howard, S. C.; Kuzio, J.; Lopez-Ferber, M.; Possee, R. D. The complete DNA sequence of Autographa californica nuclear polyhedrosis virus. *Virology* **1994**, *202*, 586-605.
2. de Castro Oliveira, J. V.; Wolff, J. L. C.; Garcia-Maruniak, A.; Ribeiro, B. M.; de Castro, M. E. B.; de Souza, M. L.; Moscardi, F.; Maruniak, J. E.; de Andrade Zanotto, P. M. Genome of the most widely used viral biopesticide: Anticarsia gemmatilis multiple nucleopolyhedrovirus. *J. Gen. Virol.* **2006**, *87*, 3233-3250.
3. Brito, A. F. d.; Braconi, C. T.; Weidmann, M.; Dilcher, M.; Alves, J. M. P.; Gruber, A.; Zanotto, P. M. d. A. The pangenome of the Anticarsia gemmatilis multiple nucleopolyhedrovirus (AgMNPV). *Genome Biol. Evol.* **2016**, *8*, 94-108.
4. Nie, Z. M.; Zhang, Z. F.; Dan, W.; He, P. A.; Jiang, C. Y.; Song, L.; Chen, F.; Xu, J.; Yang, L.; Yu, L. L. Complete sequence and organization of Antheraea pernyi

- nucleopolyhedrovirus, a dr-rich baculovirus. *BMC Genomics* **2007**, *8*, 1-14.
5. Gomi, S.; Majima, K.; Maeda, S. Sequence analysis of the genome of *Bombyx mori* nucleopolyhedrovirus. *J. Gen. Virol.* **1999**, *80*, 1323-1337.
  6. Xu, Y. P.; Ye, Z. P.; Niu, C. Y.; Bao, Y. Y.; Wang, W. B.; Shen, W. D.; Zhang, C. X. Comparative Analysis of the Genomes of *Bombyx mandarina* and *Bombyx mori* Nucleopolyhedroviruses. *J. Microbiol.* **2010**, *48*, 102-110.
  7. Wang, J.; Zhu, Z.; Zhang, L.; Hou, D.; Wang, M.; Arif, B.; Kou, Z.; Wang, H.; Deng, F.; Hu, Z. Genome sequencing and analysis of *Catopsilia pomona* nucleopolyhedrovirus: a distinct species in group I *Alphabaculovirus*. *PLoS One* **2016**, *11*, e0155134.
  8. Lauzon, H. A.; Jamieson, P. B.; Krell, P. J.; Arif, B. M. Gene organization and sequencing of the *Choristoneura fumiferana* defective nucleopolyhedrovirus genome. *J. Gen. Virol.* **2005**, *86*, 945-961.
  9. De Jong, J. G.; Lauzon, H. A.; Dominy, C.; Poloumienko, A.; Carstens, E. B.; Arif, B. M.; Krell, P. J. Analysis of the *Choristoneura fumiferana* nucleopolyhedrovirus genome. *J. Gen. Virol.* **2005**, *86*, 929-943.
  10. Rohrmann, G. F.; Erlandson, M. A.; Theilmann, D. A. Genome sequence of an alphabaculovirus isolated from *Choristoneura murinana*. *Genome Announc.* **2014**, *2*, e01135-01113.
  11. Castro, M. E. B.; Ribeiro, Z. M. A.; Santos, A. C. B.; Souza, M. L.; Machado, E. B.; Sousa, N. J.; Moscardi, F. Identification of a new nucleopolyhedrovirus from naturally-infected *Condylorrhiza vestigialis* (Guenée)(Lepidoptera: Crambidae) larvae on poplar plantations in South Brazil. *J. Invertebr. Pathol.* **2009**, *102*, 149-154.
  12. Thumbi, D. K.; Béliveau, C.; Cusson, M.; Lapointe, R.; Lucarotti, C. J. Comparative genome sequence analysis of *Choristoneura occidentalis* Freeman and *C. rosaceana* Harris (Lepidoptera: Tortricidae) alphabaculoviruses. *PLoS One* **2013**, *8*, e68968.
  13. Zhu, Z.; Wang, J.; Wang, Q.; Yin, F.; Liu, X.; Hou, D.; Zhang, L.; Liu, H.; Li, J.; Arif, B. M. Genome characteristics of the *Cyclophragma undans* nucleopolyhedrovirus: a distinct species in group I of *Alphabaculovirus*. *Virol. Sin.* **2018**, *33*, 359-368.
  14. Krejmer, M.; Skrzecz, I.; Wasag, B.; Szewczyk, B.; Rabalski, L. The genome of *Dasychira pudibunda* nucleopolyhedrovirus (DapuNPV) reveals novel genetic connection between baculoviruses infecting moths of the Lymantriidae family. *BMC Genomics* **2015**, *16*, 1-13.
  15. Hyink, O.; Dellow, R. A.; Olsen, M. J.; Caradoc-Davies, K. M.; Drake, K.; Herniou, E. A.; Cory, J. S.; O'Reilly, D. R.; Ward, V. K. Whole genome analysis of the *Epiphyas postvittana* nucleopolyhedrovirus. *J. Gen. Virol.* **2002**, *83*, 957-971.
  16. Ikeda, M.; Shikata, M.; Shirata, N.; Chaeychomsri, S.; Kobayashi, M. Gene organization and complete sequence of the *Hyphantria cunea* nucleopolyhedrovirus genome. *J. Gen. Virol.* **2006**, *87*, 2549-2562.
  17. Chen, Y. R.; Wu, C. Y.; Lee, S. T.; Wu, Y. J.; Lo, C. F.; Tsai, M. F.; Wang, C. H. Genomic and host range studies of *Maruca vitrata* nucleopolyhedrovirus. *J. Gen. Virol.* **2008**, *89*, 2315-2330.
  18. Ahrens, C.; Russell, R.; Funk, C.; Evans, J.; Harwood, S.; Rohrmann, G. The sequence of the *Orgyia pseudotsugata* multinucleocapsid nuclear polyhedrosis virus genome. *Virology* **1997**, *229*, 381-399.
  19. Wang, J.; Hou, D.; Wang, Q.; Kuang, W.; Zhang, L.; Li, J.; Shen, S.; Deng, F.; Wang, H.; Hu, Z. Genome analysis of a novel group I alphabaculovirus obtained from *Oxyplax ochracea*. *PLoS One* **2018**, *13*, e0192279.
  20. Qian, H.; Zhang, Y.; Wu, Y.; Sun, P.; Zhu, S.; Guo, X.; Gao, K.; Xu, A.; Wang, W. Analysis of the genomic sequence of *Philosamia cynthia* nucleopolyhedrin virus and comparison with *Antheraea pernyi* nucleopolyhedrin virus. *BMC Genomics* **2013**, *14*, 115.
  21. Harrison, R. L.; Lynn, D. E. Genomic sequence analysis of a nucleopolyhedrovirus isolated from the diamondback moth, *Plutella xylostella*. *Virus Genes* **2007**, *35*, 857-873.
  22. Harrison, R. L.; Bonning, B. C. Comparative analysis of the genomes of *Rachiplusia ou* and *Autographa californica* multiple nucleopolyhedroviruses. *J. Gen. Virol.* **2003**, *84*, 1827-1842.
  23. Wang, Y. S.; Huang, G. H.; Cheng, X. H.; Wang, X.; Garretson, T. A.; Dai, L. Y.; Zhang, C. X.; Cheng, X. W. Genome of *Thysanoplusia orichalcea* multiple

- nucleopolyhedrovirus lacks the superoxide dismutase gene. *J. Virol.* **2012**, *86*, 11948-11949.
24. Nakai, M.; Goto, C.; Kang, W.; Shikata, M.; Luque, T.; Kunimi, Y. Genome sequence and organization of a nucleopolyhedrovirus isolated from the smaller tea tortrix, *Adoxophyes honmai*. *Virology* **2003**, *316*, 171-183.
  25. Hilton, S.; Winstanley, D. Genomic sequence and biological characterization of a nucleopolyhedrovirus isolated from the summer fruit tortrix, *Adoxophyes orana*. *J. Gen. Virol.* **2008**, *89*, 2898-2908.
  26. Harrison, R. L. Genomic sequence analysis of the Illinois strain of the Agrotis ipsilon multiple nucleopolyhedrovirus. *Virus Genes* **2009**, *38*, 155-170.
  27. Jakubowska, A. K.; Peters, S. A.; Ziemnicka, J.; Vlak, J. M.; van Oers, M. M. Genome sequence of an enhancin gene-rich nucleopolyhedrovirus (NPV) from *Agrotis segetum*: collinearity with *Spodoptera exigua* multiple NPV. *J. Gen. Virol.* **2006**, *87*, 537-551.
  28. Wennmann, J. T.; Alletti, G. G.; Jehle, J. A. The genome sequence of Agrotis segetum nucleopolyhedrovirus B (AgseNPV-B) reveals a new baculovirus species within the agrotis baculovirus complex. *Virus Genes* **2015**, *50*, 260-276.
  29. Li, J.; Duan, X.; Wang, Q.; Zhang, L.; Deng, F.; Wang, H.; Hu, Z.; Wang, M.; Wang, J. Genome analysis of a novel clade II. b alphabaculovirus obtained from *Artaxa digramma*. *Viruses* **2019**, *11*, 925.
  30. Zhu, Z.; Yin, F.; Liu, X.; Hou, D.; Wang, J.; Zhang, L.; Arif, B.; Wang, H.; Deng, F.; Hu, Z. Genome sequence and analysis of Buzura suppressaria nucleopolyhedrovirus: a group II alphabaculovirus. *PLoS One* **2014**, *9*, e86450.
  31. van Oers, M. M.; Abma-Henkens, M. H.; Herniou, E. A.; de Groot, J. C.; Peters, S.; Vlak, J. M. Genome sequence of Chrysodeixis chalcites nucleopolyhedrovirus, a baculovirus with two DNA photolyase genes. *J. Gen. Virol.* **2005**, *86*, 2069-2080.
  32. Craveiro, S. R.; Santos, L. A. V.; Togawa, R. C.; Inglis, P. W.; Grynberg, P.; Ribeiro, Z. M. A.; Ribeiro, B. M.; Castro, M. E. B. Complete genome sequences of six Chrysodeixis includens nucleopolyhedrovirus isolates from Brazil and Guatemala. *Genome Announc.* **2016**, *4*, e01192-01116.
  33. Zhu, S. Y.; Yi, J. P.; Shen, W. D.; Wang, L. Q.; He, H. G.; Wang, Y.; Li, B.; Wang, W. B. Genomic sequence, organization and characteristics of a new nucleopolyhedrovirus isolated from *Clanis bilineata* larva. *BMC Genomics* **2009**, *10*, 91.
  34. Marsberg, T.; Jukes, M. D.; Krejmer-Rabalska, M.; Rabalski, L.; Knox, C. M.; Moore, S. D.; Hill, M. P.; Szewczyk, B. Morphological, genetic and biological characterisation of a novel alphabaculovirus isolated from *Cryptophlebia peltastica* (Lepidoptera: Tortricidae). *J. Invertebr. Pathol.* **2018**, *157*, 90-99.
  35. Ma, X. C.; Shang, J. Y.; Yang, Z. N.; Bao, Y. Y.; Xiao, Q.; Zhang, C. X. Genome sequence and organization of a nucleopolyhedrovirus that infects the tea looper caterpillar, *Ectropis obliqua*. *Virology* **2007**, *360*, 235-246.
  36. Tang, X.-D.; Xiao, Q.; Ma, X.-C.; Zhu, Z.-R.; Zhang, C.-X. Morphology and genome of Euproctis pseudoconsersa nucleopolyhedrovirus. *Virus Genes* **2009**, *38*, 495-506.
  37. Tang, P.; Zhang, H.; Li, Y. N.; Han, B.; Wang, G. Z.; Qin, Q. L.; Zhang, Z. F. Genomic sequencing and analyses of HearMNPV-a new multinucleocapsid nucleopolyhedrovirus isolated from *Helicoverpa armigera*. *Virol. J.* **2012**, *9*.
  38. Ogembo, J. G.; Caoili, B. L.; Shikata, M.; Chaeychomsri, S.; Kobayashi, M.; Ikeda, M. Comparative genomic sequence analysis of novel *Helicoverpa armigera* nucleopolyhedrovirus (NPV) isolated from Kenya and three other previously sequenced *Helicoverpa* spp. NPVs. *Virus Genes* **2009**, *39*, 261-272.
  39. Zhang, C.-X.; Ma, X.-C.; Guo, Z.-J. Comparison of the complete genome sequence between C1 and G4 isolates of the *Helicoverpa armigera* single nucleocapsid nucleopolyhedrovirus. *Virology* **2005**, *333*, 190-199.
  40. Rohrmann, G. F.; Erlandson, M. A.; Theilmann, D. A. The genome of a baculovirus isolated from *Hemileuca* sp. encodes a serpin ortholog. *Virus Genes* **2013**, *47*, 357-364.
  41. Nguyen, T. T.; Suryamohan, K.; Kuriakose, B.; Janakiraman, V.; Reichelt, M.; Chaudhuri, S.; Guillory, J.; Divakaran, N.; Rabins, P.; Goel, R. Comprehensive analysis of single molecule sequencing-derived complete genome and whole transcriptome of *Hyposidra talaca* nuclear polyhedrosis virus. *Sci. Rep.* **2018**, *8*, 1-11.
  42. Rohrmann, G. F.; Erlandson, M. A.; Theilmann, D. A. Genome sequence of an alphabaculovirus isolated from the oak looper, *Lambdina fiscellaria*, contains a putative 2-kilobase-pair transposable element encoding a transposase and a FLYWCH domain-containing protein. *Genome Announc.* **2015**, *3*, e00186-00115.

43. Kuzio, J.; Pearson, M. N.; Harwood, S. H.; Funk, C. J.; Evans, J. T.; Slavicek, J. M.; Rohrmann, G. F. Sequence and analysis of the genome of a baculovirus pathogenic for *Lymantria dispar*. *Virology* **1999**, *253*, 17-34.
44. Xiao, H.; Qi, Y. Genome sequence of *Leucania separata* nucleopolyhedrovirus. *Virus Genes* **2007**, *35*, 845-856.
45. Nai, Y.-S.; Wu, C.-Y.; Wang, T.-C.; Chen, Y.-R.; Lau, W.-H.; Lo, C.-F.; Tsai, M.-F.; Wang, C.-H. Genomic sequencing and analyses of *Lymantria xylinea* multiple nucleopolyhedrovirus. *BMC Genomics* **2010**, *11*, 116.
46. Choi, J. B.; Heo, W. I.; Shin, T. Y.; Bae, S. M.; Kim, W. J.; Kim, J. I.; Kwon, M.; Choi, J. Y.; Je, Y. H.; Jin, B. R. Complete genomic sequences and comparative analysis of *Mamestra brassicae* nucleopolyhedrovirus isolated in Korea. *Virus Genes* **2013**, *47*, 133-151.
47. Li, Q.; Donly, C.; Li, L.; Willis, L. G.; Theilmann, D. A.; Erlandson, M. Sequence and organization of the *Mamestra configurata* nucleopolyhedrovirus genome. *Virology* **2002**, *294*, 106-121.
48. Li, L.; Donly, C.; Li, Q.; Willis, L. G.; Keddie, B. A.; Erlandson, M. A.; Theilmann, D. A. Identification and genomic analysis of a second species of nucleopolyhedrovirus isolated from *Mamestra configurata*. *Virology* **2002**, *297*, 226-244.
49. Gencer, D.; Nalcacioglu, R.; Demirbag, Z.; Demir, I. Complete genome sequence analysis of the *Malacosoma neustria* nucleopolyhedrovirus from Turkey. *Virus Genes* **2018**, *54*, 706-718.
50. Harrison, R. L.; Mowery, J. D.; Rowley, D. L.; Bauchan, G. R.; Theilmann, D. A.; Rohrmann, G. F.; Erlandson, M. A. The complete genome sequence of a third distinct baculovirus isolated from the true armyworm, *Mythimna unipuncta*, contains two copies of the *lef-7* gene. *Virus Genes* **2018**, *54*, 297-310.
51. Harrison, R. L.; Mowery, J. D.; Bauchan, G. R.; Theilmann, D. A.; Erlandson, M. A. The complete genome sequence of a second alphabaculovirus from the true armyworm, *Mythimna unipuncta*: implications for baculovirus phylogeny and host specificity. *Virus Genes* **2019**, *55*, 104-116.
52. Harrison, R. L.; Rowley, D. L.; Mowery, J. D.; Bauchan, G. R.; Burand, J. P. The *Operophtera brumata* nucleopolyhedrovirus (OpbuNPV) represents an early, divergent lineage within genus *Alphabaculovirus*. *Viruses* **2017**, *9*, 307.
53. Thumbi, D. K.; Eveleigh, R. J.; Lucarotti, C. J.; Lapointe, R.; Graham, R. I.; Pavlik, L.; Lauzon, H. A.; Arif, B. M. Complete sequence, analysis and organization of the *Orgyia leucostigma* nucleopolyhedrovirus genome. *Viruses* **2011**, *3*, 2301-2327.
54. Ardisson-Araújo, D. M.; Lima, R. N.; Melo, F. L.; Clem, R. J.; Huang, N.; Báo, S. N.; Sosa-Gómez, D. R.; Ribeiro, B. M. Genome sequence of *Perigonia lusca* single nucleopolyhedrovirus: insights into the evolution of a nucleotide metabolism enzyme in the family *Baculoviridae*. *Sci. Rep.* **2016**, *6*, 24612.
55. Rohrmann, G. F.; Erlandson, M. A.; Theilmann, D. A. A distinct group II alphabaculovirus isolated from a *Peridroma* species. *Genome Announc.* **2015**, *3*, e00185-00115.
56. Craveiro, S. R.; Inglis, P. W.; Togawa, R. C.; Grynberg, P.; Melo, F. L.; Ribeiro, Z. M. A.; Ribeiro, B. M.; Báo, S. N.; Castro, M. E. B. The genome sequence of *Pseudoplusia includens* single nucleopolyhedrovirus and an analysis of *p26* gene evolution in the baculoviruses. *BMC Genomics* **2015**, *16*, 127.
57. Chen, Y. J.; Qi, B. X.; Zheng, G. L.; Zhang, Y.; Deng, F.; Wan, F. H.; Li, C. Y. Identification and genomic sequence analysis of a new *Spodoptera exigua* multiple nucleopolyhedrovirus, SeMNPV-QD, isolated from Qingdao, China. *J. Invertebr. Pathol.* **2019**, *160*, 8-17.
58. Ijkel, W. F.; Van Strien, E. A.; Heldens, J. G.; Broer, R.; Zuidema, D.; Goldbach, R. W.; Vlak, J. M. Sequence and organization of the *Spodoptera exigua* multicapsid nucleopolyhedrovirus genome. *J. Gen. Virol.* **1999**, *80*, 3289-3304.
59. Harrison, R. L.; Puttler, B.; Popham, H. J. Genomic sequence analysis of a fast-killing isolate of *Spodoptera frugiperda* multiple nucleopolyhedrovirus. *J. Gen. Virol.* **2008**, *89*, 775-790.
60. Harrison, R. L.; Rowley, D. L. Complete genome sequence of an alphabaculovirus from the southern armyworm, *Spodoptera eridania*. *Microbiol. Resour. Ann.* **2019**, *8*, e01277-18.
61. Breitenbach, J. E.; El-Sheikh, E.-S. A.; Harrison, R. L.; Rowley, D. L.; Sparks, M. E.; Gundersen-Rindal, D. E.; Popham, H. J. Determination and analysis of the genome sequence of *Spodoptera littoralis* multiple nucleopolyhedrovirus. *Virus Res.* **2013**, *171*, 194-208.



62. Pang, Y.; Yu, J.; Wang, L.; Hu, X.; Bao, W.; Li, G.; Chen, C.; Han, H.; Hu, S.; Yang, H. Sequence analysis of the *Spodoptera litura* multicapsid nucleopolyhedrovirus genome. *Virology* **2001**, *287*, 391-404.
63. Liu, X.; Yin, F.; Zhu, Z.; Hou, D.; Wang, J.; Zhang, L.; Wang, M.; Wang, H.; Hu, Z.; Deng, F. Genomic sequencing and analysis of *Suca jujuba* nucleopolyhedrovirus. *PLoS One* **2014**, *9*, e110023.
64. Willis, L. G.; Siepp, R.; Stewart, T. M.; Erlandson, M. A.; Theilmann, D. A. Sequence analysis of the complete genome of *Trichoplusia ni* single nucleopolyhedrovirus and the identification of a baculoviral photolyase gene. *Virology* **2005**, *338*, 209-226.
65. Santos, E. R.; Oliveira, L. B.; Peterson, L.; Sosa-Gómez, D. R.; Ribeiro, B. M.; Ardisson-Araújo, D. M. The complete genome sequence of the first hesperiid-infecting alphabaculovirus isolated from the leguminous pest *Urbanus proteus* (Lepidoptera: Hesperidae). *Virus Res.* **2018**, *249*, 76-84.
66. Wormleaton, S.; Kuzio, J.; Winstanley, D. The complete sequence of the *Adoxophyes orana* granulovirus genome. *Virology* **2003**, *311*, 350-365.
67. Alletti, G. G.; Eigenbrod, M.; Carstens, E. B.; Kleespies, R. G.; Jehle, J. A. The genome sequence of *Agrotis segetum* granulovirus, isolate AgseGV-DA, reveals a new Betabaculovirus species of a slow killing granulovirus. *J. Invertebr. Pathol.* **2017**, *146*, 58-68.
68. Escasa, S. R.; Lauzon, H. A.; Mathur, A. C.; Krell, P. J.; Arif, B. M. Sequence analysis of the *Choristoneura occidentalis* granulovirus genome. *J. Gen. Virol.* **2006**, *87*, 1917-1933.
69. Liang, Z.; Zhang, X.; Yin, X.; Cao, S.; Xu, F. Genomic sequencing and analysis of *Clostera anachoreta* granulovirus. *Arch. Virol.* **2011**, *156*, 1185-1198.
70. Liang, Z.; Zhang, X.; Yin, X.; Song, X.; Shao, X.; Wang, L. Comparative analysis of the genomes of *Clostera anastomosis* (L.) granulovirus and *Clostera anachoreta* granulovirus. *Arch. Virol.* **2013**, *158*, 2109-2114.
71. Yin, F.; Zhu, Z.; Liu, X.; Hou, D.; Wang, J.; Zhang, L.; Wang, M.; Kou, Z.; Wang, H.; Deng, F. The complete genome of a new betabaculovirus from *Clostera anastomosis*. *PLoS One* **2015**, *10*, e0132792.
72. Zhang, S.; Zhu, Z.; Sun, S. F.; Chen, Q. J.; Deng, F.; Yang, K. Genome sequencing and analysis of a granulovirus isolated from the Asiatic rice leafroller, *Cnaphalocrocis medinalis*. *Virol. Sin.* **2015**, *30*, 417-424.
73. Luque, T.; Finch, R.; Crook, N.; O'Reilly, D. R.; Winstanley, D. The complete sequence of the *Cydia pomonella* granulovirus genome. *J. Gen. Virol.* **2001**, *82*, 2531-2547.
74. Lange, M.; Jehle, J. A. The genome of the *Cryptophlebia leucotreta* granulovirus. *Virology* **2003**, *317*, 220-236.
75. Ardisson-Araújo, D. M.; Melo, F. L.; Clem, R. J.; Wolff, J. L.; Ribeiro, B. M. A betabaculovirus-encoded *gp64* homolog codes for a functional envelope fusion protein. *J. Virol.* **2016**, *90*, 1668-1672.
76. Ferrelli, M. L.; Salvador, R.; Biedma, M. E.; Berretta, M. F.; Haase, S.; Sciocco-Cap, A.; Ghiringhelli, P. D.; Romanowski, V. Genome of *Epinotia aporema* granulovirus (EpapGV), a polyorganotropic fast killing betabaculovirus with a novel thymidylate kinase gene. *BMC Genomics* **2012**, *13*, 548.
77. Ardisson-Araújo, D. M. P.; de Melo, F. L.; de Souza Andrade, M.; Sihler, W.; Báo, S. N.; Ribeiro, B. M.; de Souza, M. L. Genome sequence of *Erinnyis ello* granulovirus (ErelGV), a natural cassava hornworm pesticide and the first sequenced sphingid-infecting betabaculovirus. *BMC Genomics* **2014**, *15*, 856.
78. Harrison, R. L.; Popham, H. J. Genomic sequence analysis of a granulovirus isolated from the Old World bollworm, *Helicoverpa armigera*. *Virus Genes* **2008**, *36*, 565-581.
79. Gencer, D.; Bayramoglu, Z.; Nalcacioglu, R.; Demirbag, Z.; Demir, I. Genome sequence analysis and organization of the *Hyphantria cunea* granulovirus (HycuGV-Hc1) from Turkey. *Genomics* **2020**, *112*, 459-466.
80. Harrison, R. L.; Rowley, D. L.; Mowery, J.; Bauchan, G. R.; Theilmann, D. A.; Rohrmann, G. F.; Erlandson, M. A. The complete genome sequence of a second distinct betabaculovirus from the true armyworm, *Mythimna unipuncta*. *PLoS One* **2017**, *12*, e0170510.
81. Taha, A.; Nour-el-Din, A.; Croizier, L.; Lo, M.; Croizier, G. Comparative analysis of the granulin regions of the *Phthorimaea operculella* and *Spodoptera littoralis* granuloviruses. *Virus Genes* **2000**, *21*, 147-155.
82. Harrison, R. L.; Rowley, D. L.; Funk, C. J. The complete genome sequence of *Plodia interpunctella* granulovirus: evidence for horizontal gene transfer and discovery of an unusual inhibitor-of-apoptosis gene. *PLoS One* **2016**, *11*, e0160389.

83. Hashimoto, Y.; Hayakawa, T.; Ueno, Y.; Fujita, T.; Sano, Y.; Matsumoto, T. Sequence analysis of the *Plutella xylostella* granulovirus genome. *Virology* **2000**, *275*, 358-372.
84. Zhang, B.-Q.; Cheng, R.-L.; Wang, X.-F.; Zhang, C.-X. The genome of *Pieris rapae* granulovirus. *J. Virol.* **2012**, *86*, 9544.
85. Cuartas, P. E.; Barrera, G. P.; Belaich, M. N.; Barreto, E.; Ghiringhelli, P. D.; Villamizar, L. F. The complete sequence of the first *Spodoptera frugiperda* betabaculovirus genome: a natural multiple recombinant virus. *Viruses* **2015**, *7*, 394-421.
86. Wang, Y.; Choi, J. Y.; Roh, J. Y.; Liu, Q.; Tao, X. Y.; Park, J. B.; Kim, J. S.; Je, Y. H. Genomic sequence analysis of granulovirus isolated from the tobacco cutworm, *Spodoptera litura*. *PLoS One* **2011**, *6*, e28163.
87. de los Ángeles Bivian-Hernández, M.; López-Tlacomulco, J.; Mares-Mares, E.; Ibarra, J. E.; Del Rincón-Castro, M. C. Genomic analysis of a *Trichoplusia ni* betabaculovirus (TnGV) with three different viral enhancing factors and two unique genes. *Arch. Virol.* **2017**, *162*, 3705-3715.
88. Hayakawa, T.; Ko, R.; Okano, K.; Seong, S.-I.; Goto, C.; Maeda, S. Sequence analysis of the *Xestia c-nigrum* granulovirus genome. *Virology* **1999**, *262*, 277-297.
89. Duffy, S. P.; Young, A. M.; Morin, B.; Lucarotti, C. J.; Koop, B. F.; Levin, D. B. Sequence analysis and organization of the *Neodiprion abietis* nucleopolyhedrovirus genome. *J. Virol.* **2006**, *80*, 6952-6963.
90. Lauzon, H. A.; Lucarotti, C. J.; Krell, P. J.; Feng, Q.; Retnakaran, A.; Arif, B. M. Sequence and organization of the *Neodiprion lecontei* nucleopolyhedrovirus genome. *J. Virol.* **2004**, *78*, 7023-7035.
91. Garcia-Maruniak, A.; Maruniak, J. E.; Zanutto, P. M.; Doumbouya, A. E.; Liu, J.-C.; Merritt, T. M.; Lanoie, J. S. Sequence analysis of the genome of the *Neodiprion sertifer* nucleopolyhedrovirus. *J. Virol.* **2004**, *78*, 7036-7051.
92. Afonso, C.; Tulman, E.; Lu, Z.; Balinsky, C.; Moser, B.; Becnel, J.; Rock, D.; Kutish, G. Genome sequence of a baculovirus pathogenic for *Culex nigripalpus*. *J. Virol.* **2001**, *75*, 11157-11165.
